# Supplementary material for: Single-cell transcriptome analysis of the heterogeneous effects of differential expression of tumor PD-L1 on responding TCR-T cells
Source: PubMed Central journal article supplement (PMC7978322; doi:10.7150/thno.55075), 2021-03-05

1 **Supplementary figures**

2 **Figure S1.** TCR<sub>MART-1</sub> construction. **(A)** Schematic design of TCR<sub>MART-1</sub>. **(B)** Expression of  
3 TCR<sub>MART-1</sub> on CD8<sup>+</sup> T cells transfected by lentivirus before (middle) and after (right) cell sorting.  
4 **(C)** Killing of T2 cells by T<sub>null</sub> and TCR-T<sub>MART-1</sub> after co-incubation for 6 h at E:T ratio of 1:1. **(D)**  
5 PD-L1 was over expressed in MEL-526 cells.

6

7 **Figure S2.** Cell clustering and tumor clusters. **(A)** UMAP visualization showing clustering of  
8 single cells among four experiment designs, colored by clusters. **(B)** Violin plot showing the  
9 expression of TCR<sub>MART-1</sub> in different cell clusters. **(C)** Heatmap of tumor cell clusters with unique  
10 signature genes. **(D)** The point plot shows the order of T cells along pseudotime in a  
11 two-dimensional state-space defined by Monocle2.

12

13 **Figure S3.** Characterization of T cell clusters, and difference between T<sub>null</sub> and TCR-T<sub>MART-1</sub>. **(A)**  
14 The expression of top 10 DEGs in C01, C02, C06, C11 and C12. **(B)** The violin plots show the  
15 expression distribution of cytokine and cytotoxicity genes in the five clusters **(C)** Differentially  
16 expressed genes in T<sub>null</sub> responding to differential proportion of PD-L1<sup>+</sup> tumor. **(D)** The bubble  
17 plot showing the top 5 pathways in T<sub>null</sub> and TCR-T<sub>MART-1</sub> targeting PDL1<sup>low</sup>, PDL1<sup>int</sup>, PDL1<sup>high</sup>  
18 tumor cells.

19

20 **Figure S4.** The expression of interleukins in T cell clusters. **(A)** The expression distribution of  
21 *IL10*, *IL19*, *IL12A*, *IL1A*, and *IL1B* in T cell clusters of T<sub>null</sub> and TCR-T<sub>MART-1</sub> responding to  
22 PD-L1<sup>high</sup>.

23

24 **Figure S5.** Expression of checkpoint molecules in clusters of  $T_{\text{null}}$  and  $\text{TCR-}T_{\text{MART-1}}$ . **(A)** The  
25 expression distribution of *CD28*, *CD27*, *TNFRSF18*, and *TNFRSF9* in cell clusters of  $T_{\text{null}}$  and  
26  $\text{TCR-}T_{\text{MART-1}}$  responding to differential proportion of  $\text{PD-L1}^+$  tumor.

27

28 **Figure S6.** Enrichment of cell death signaling in T cells and expression of *PDCDI* and *CD274*. **(A)**  
29 Heatmap of gene members from different cell death pathways. **(B)** The violin plot showing the  
30 expression level of *PDCDI* in  $T_{\text{null}}$  and  $\text{TCR-}T_{\text{MART-1}}$  responding to differential proportion of  
31  $\text{PD-L1}^+$  tumor.

32

33

**A**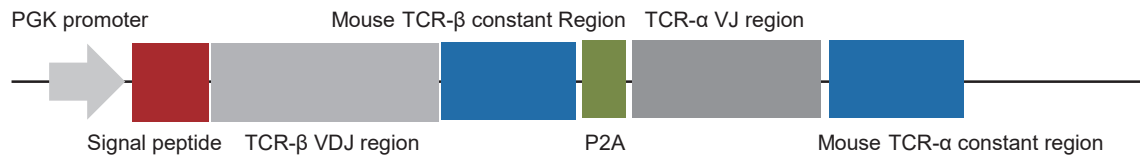**B**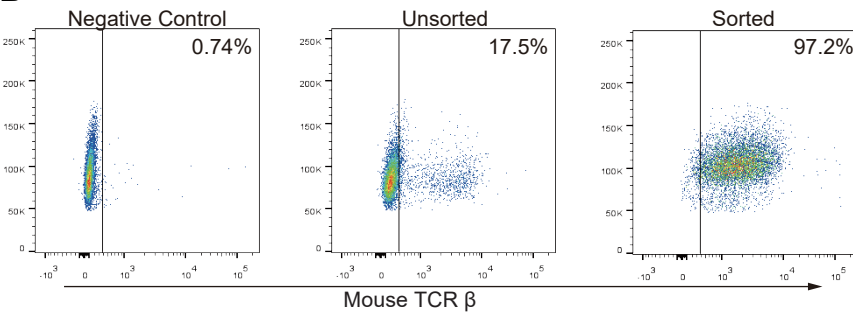**C**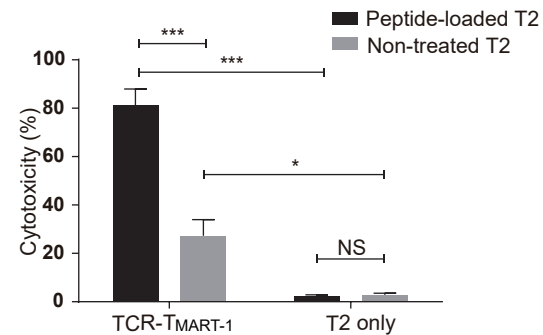**D**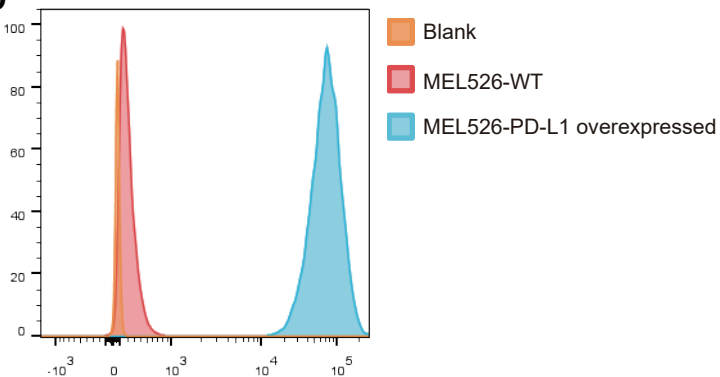

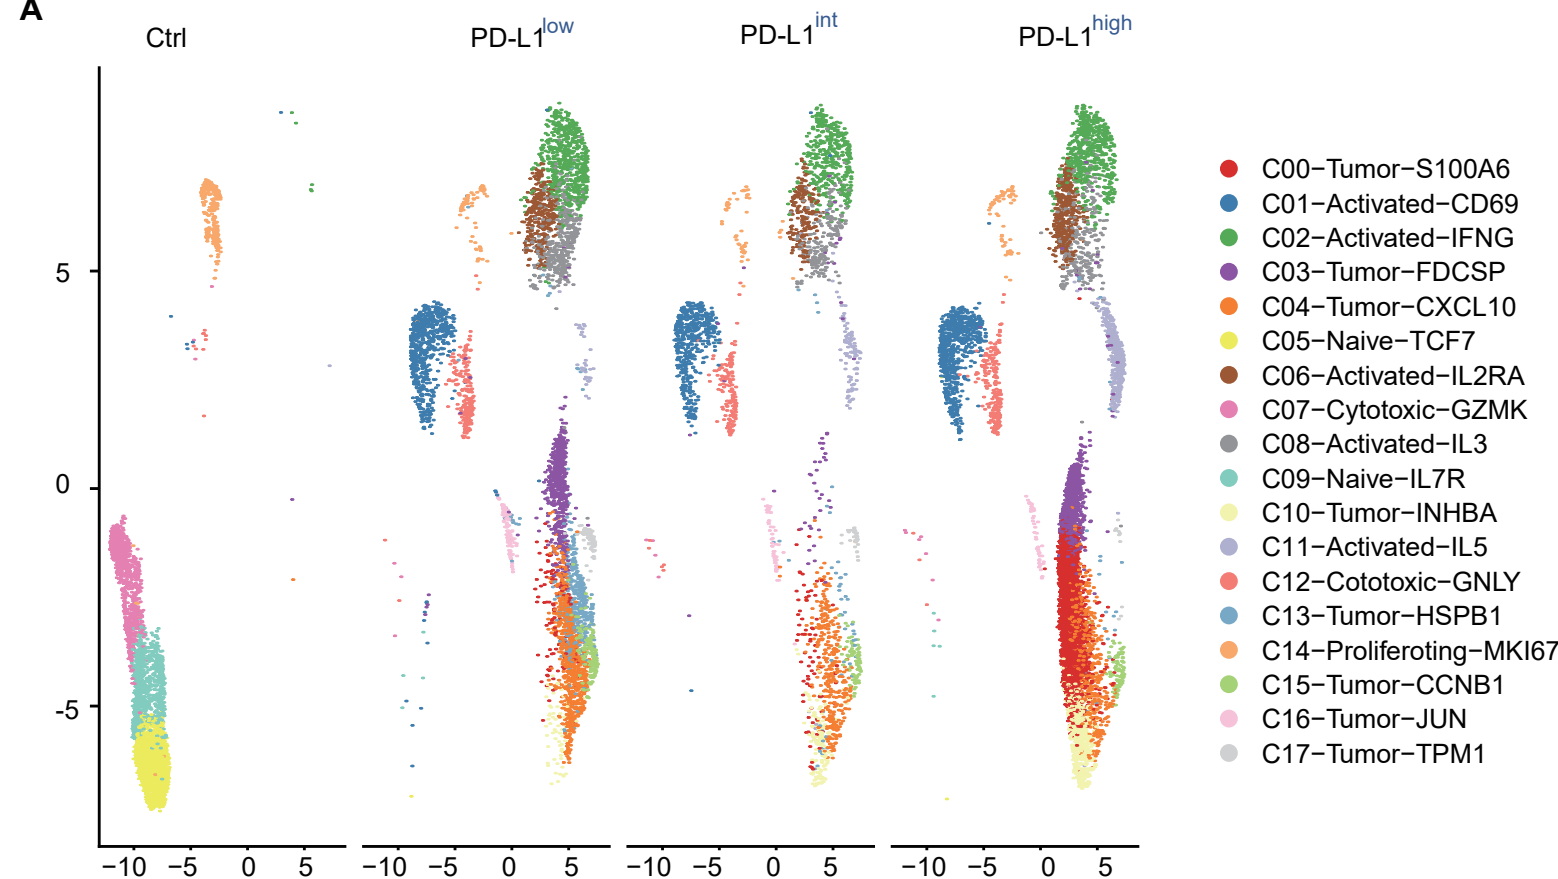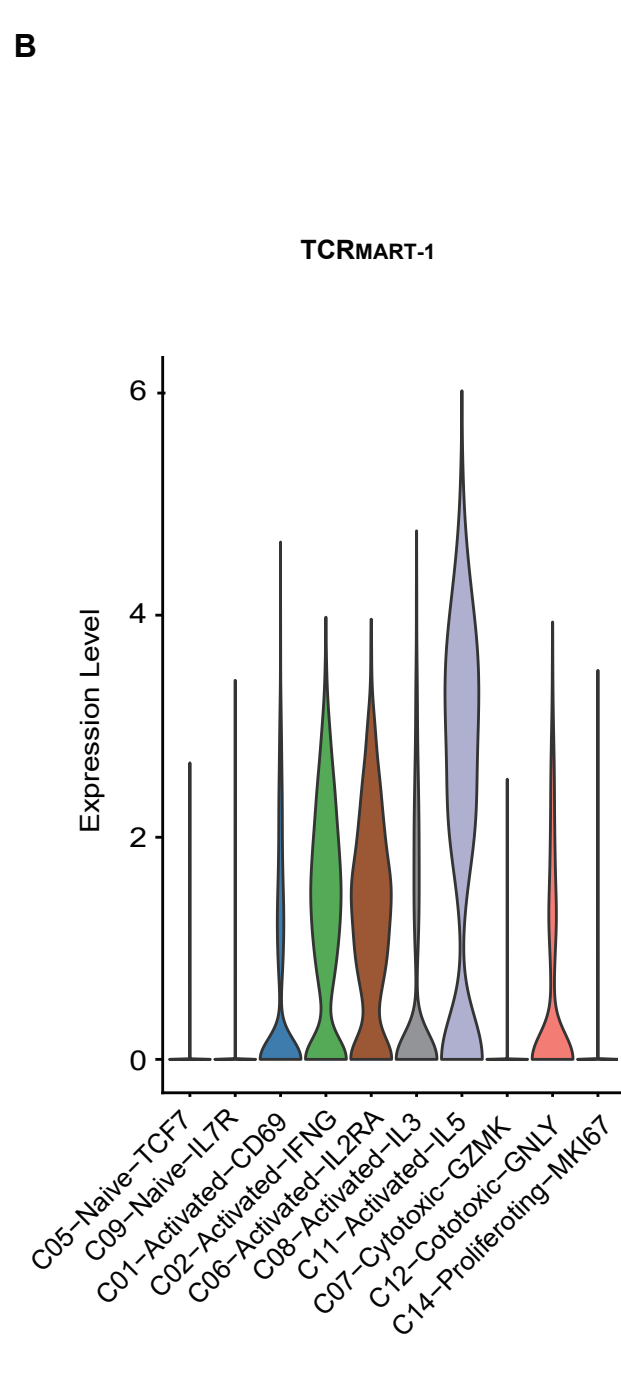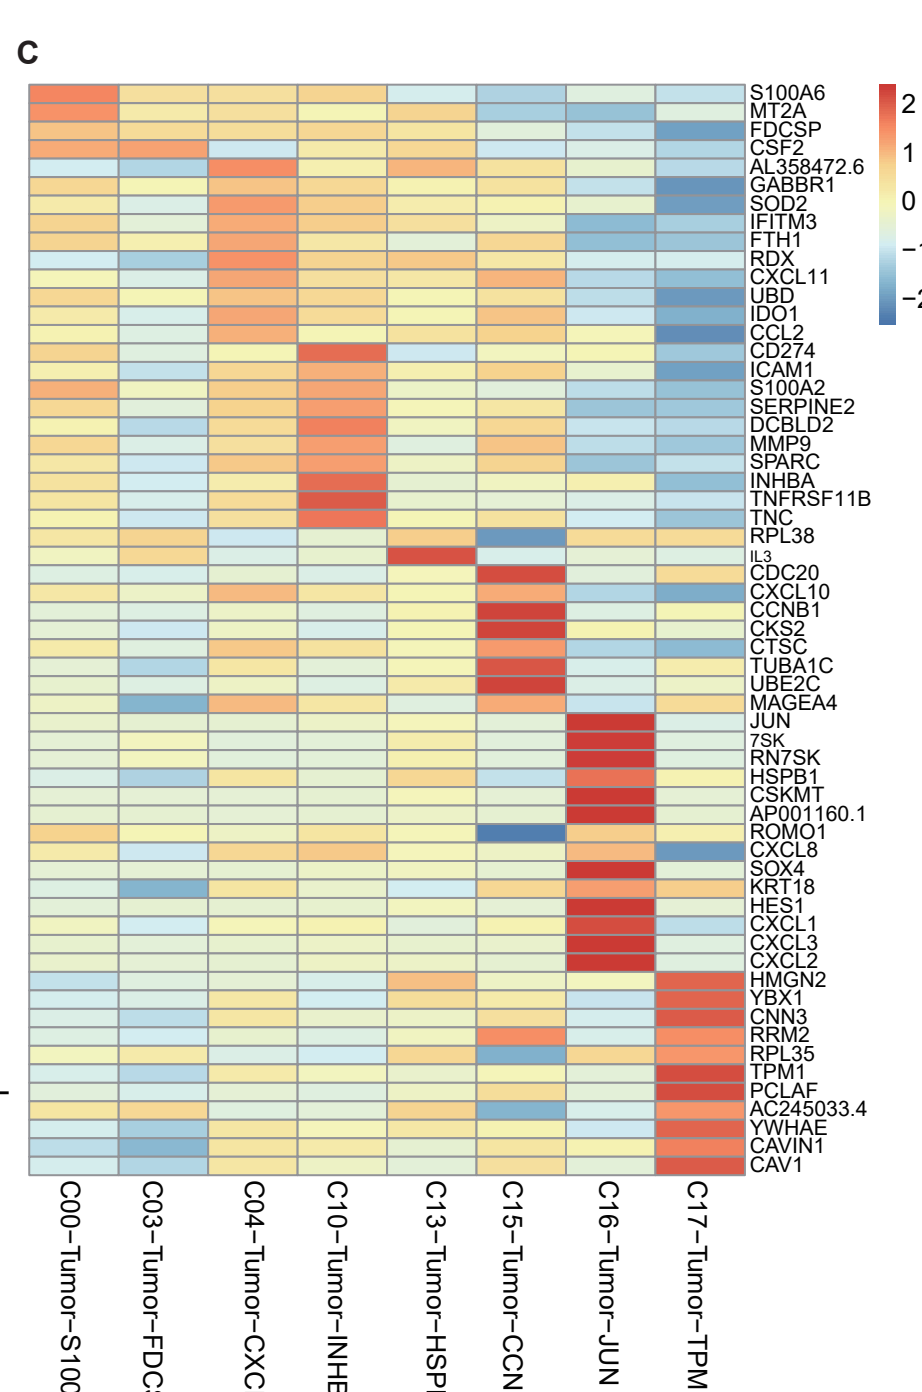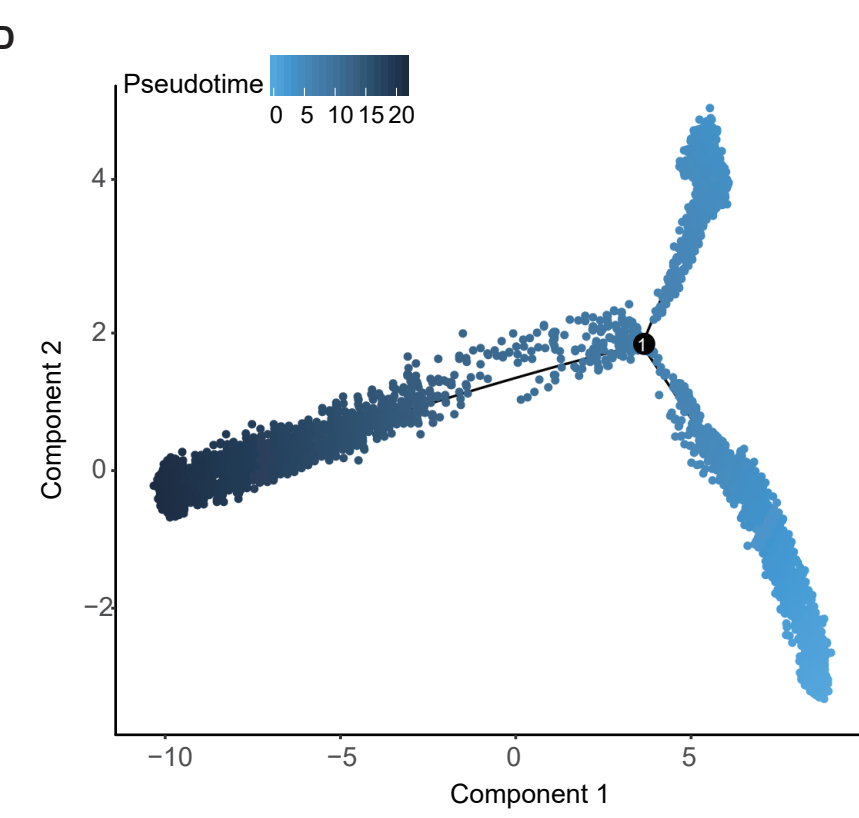



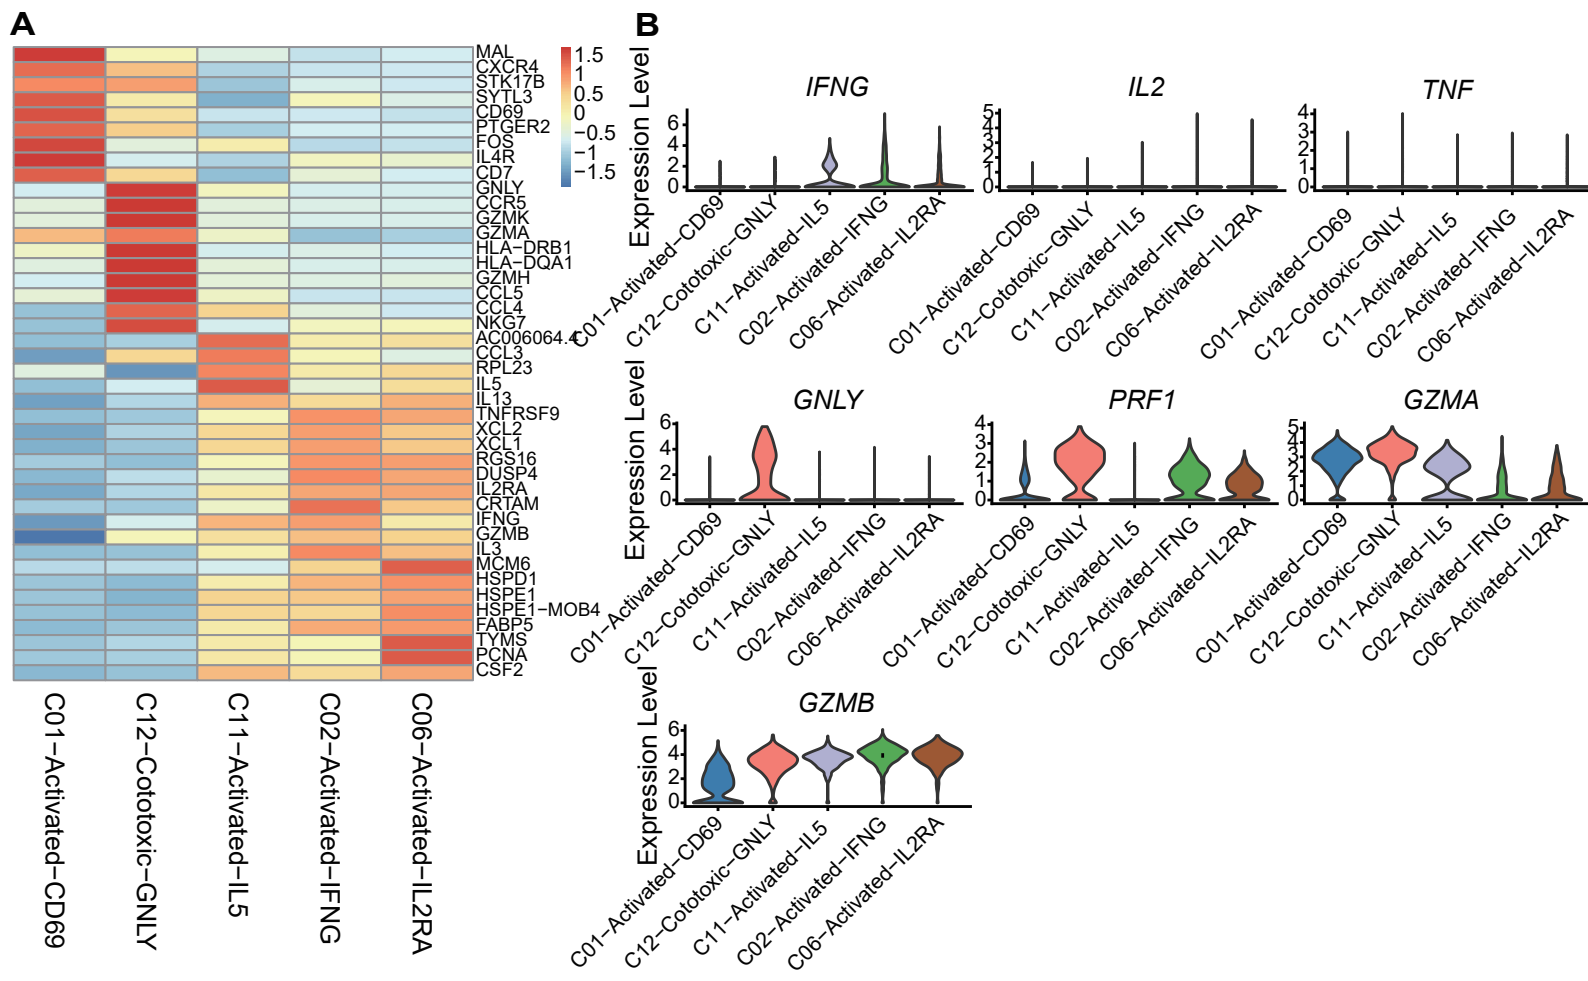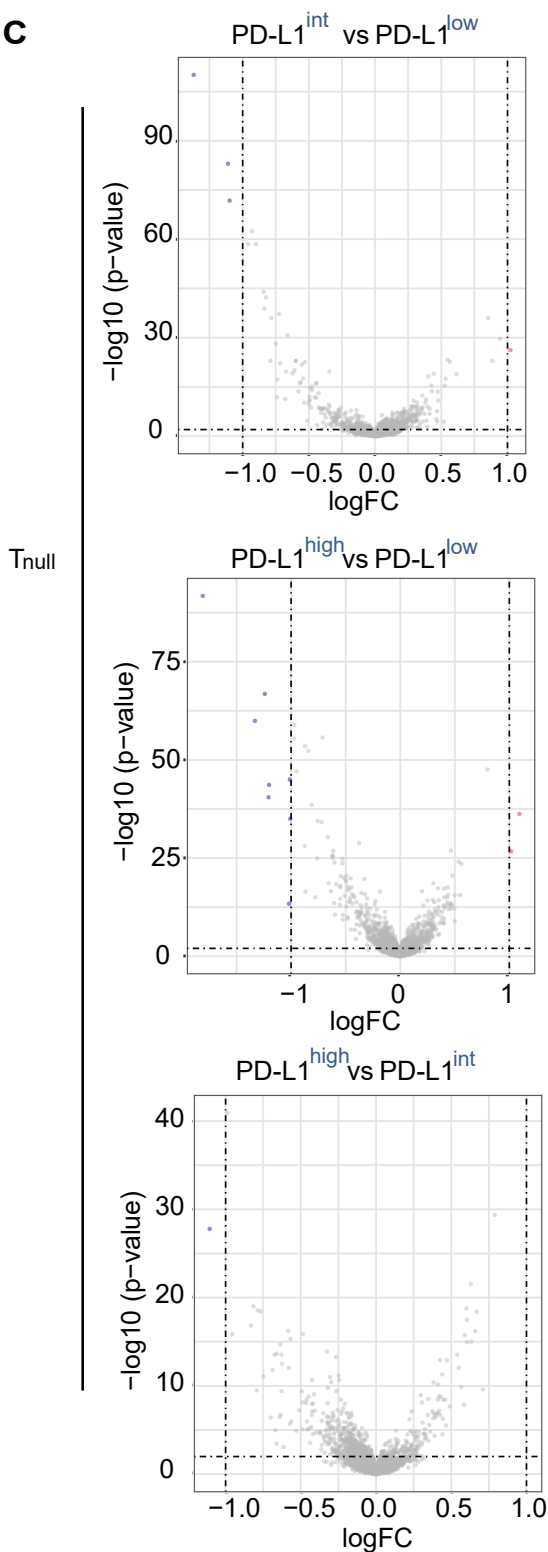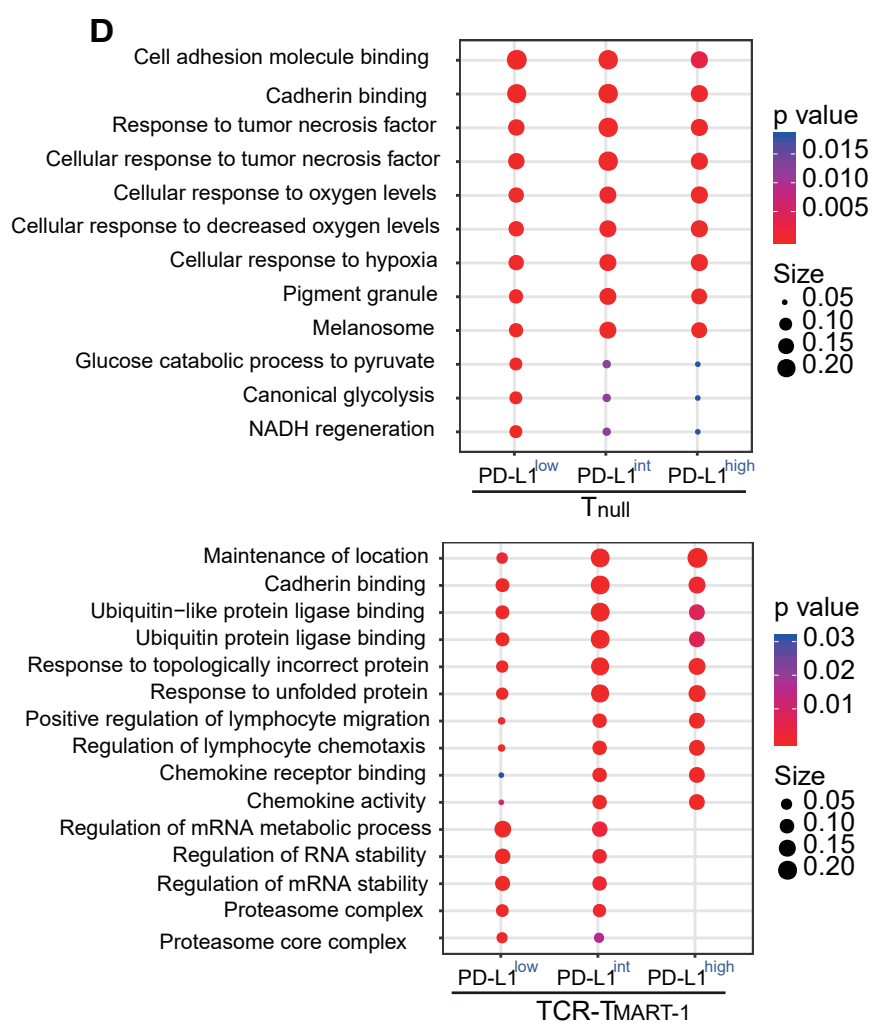

**A**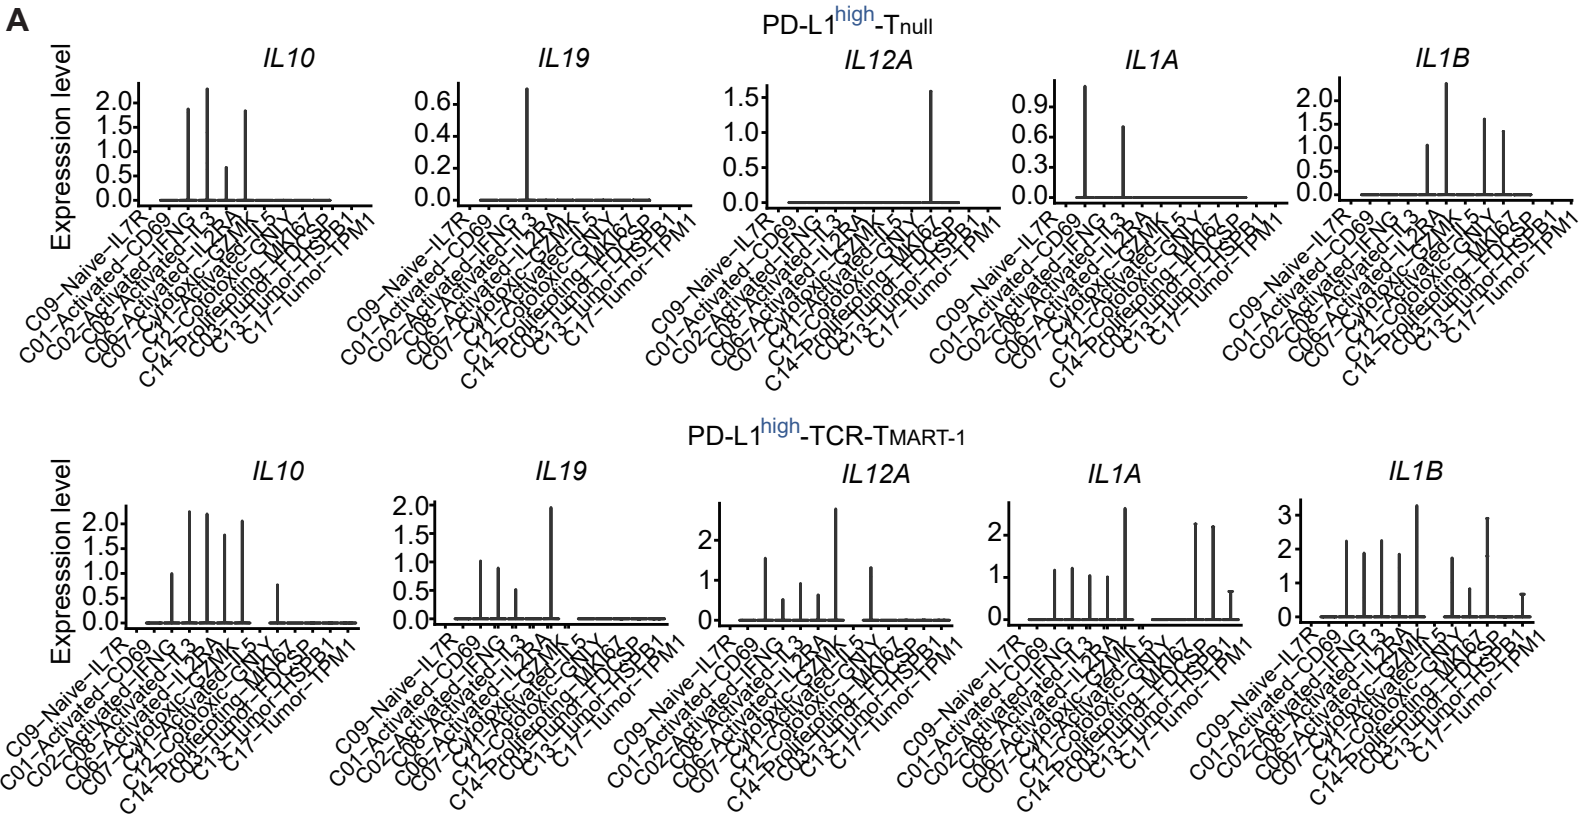

**A**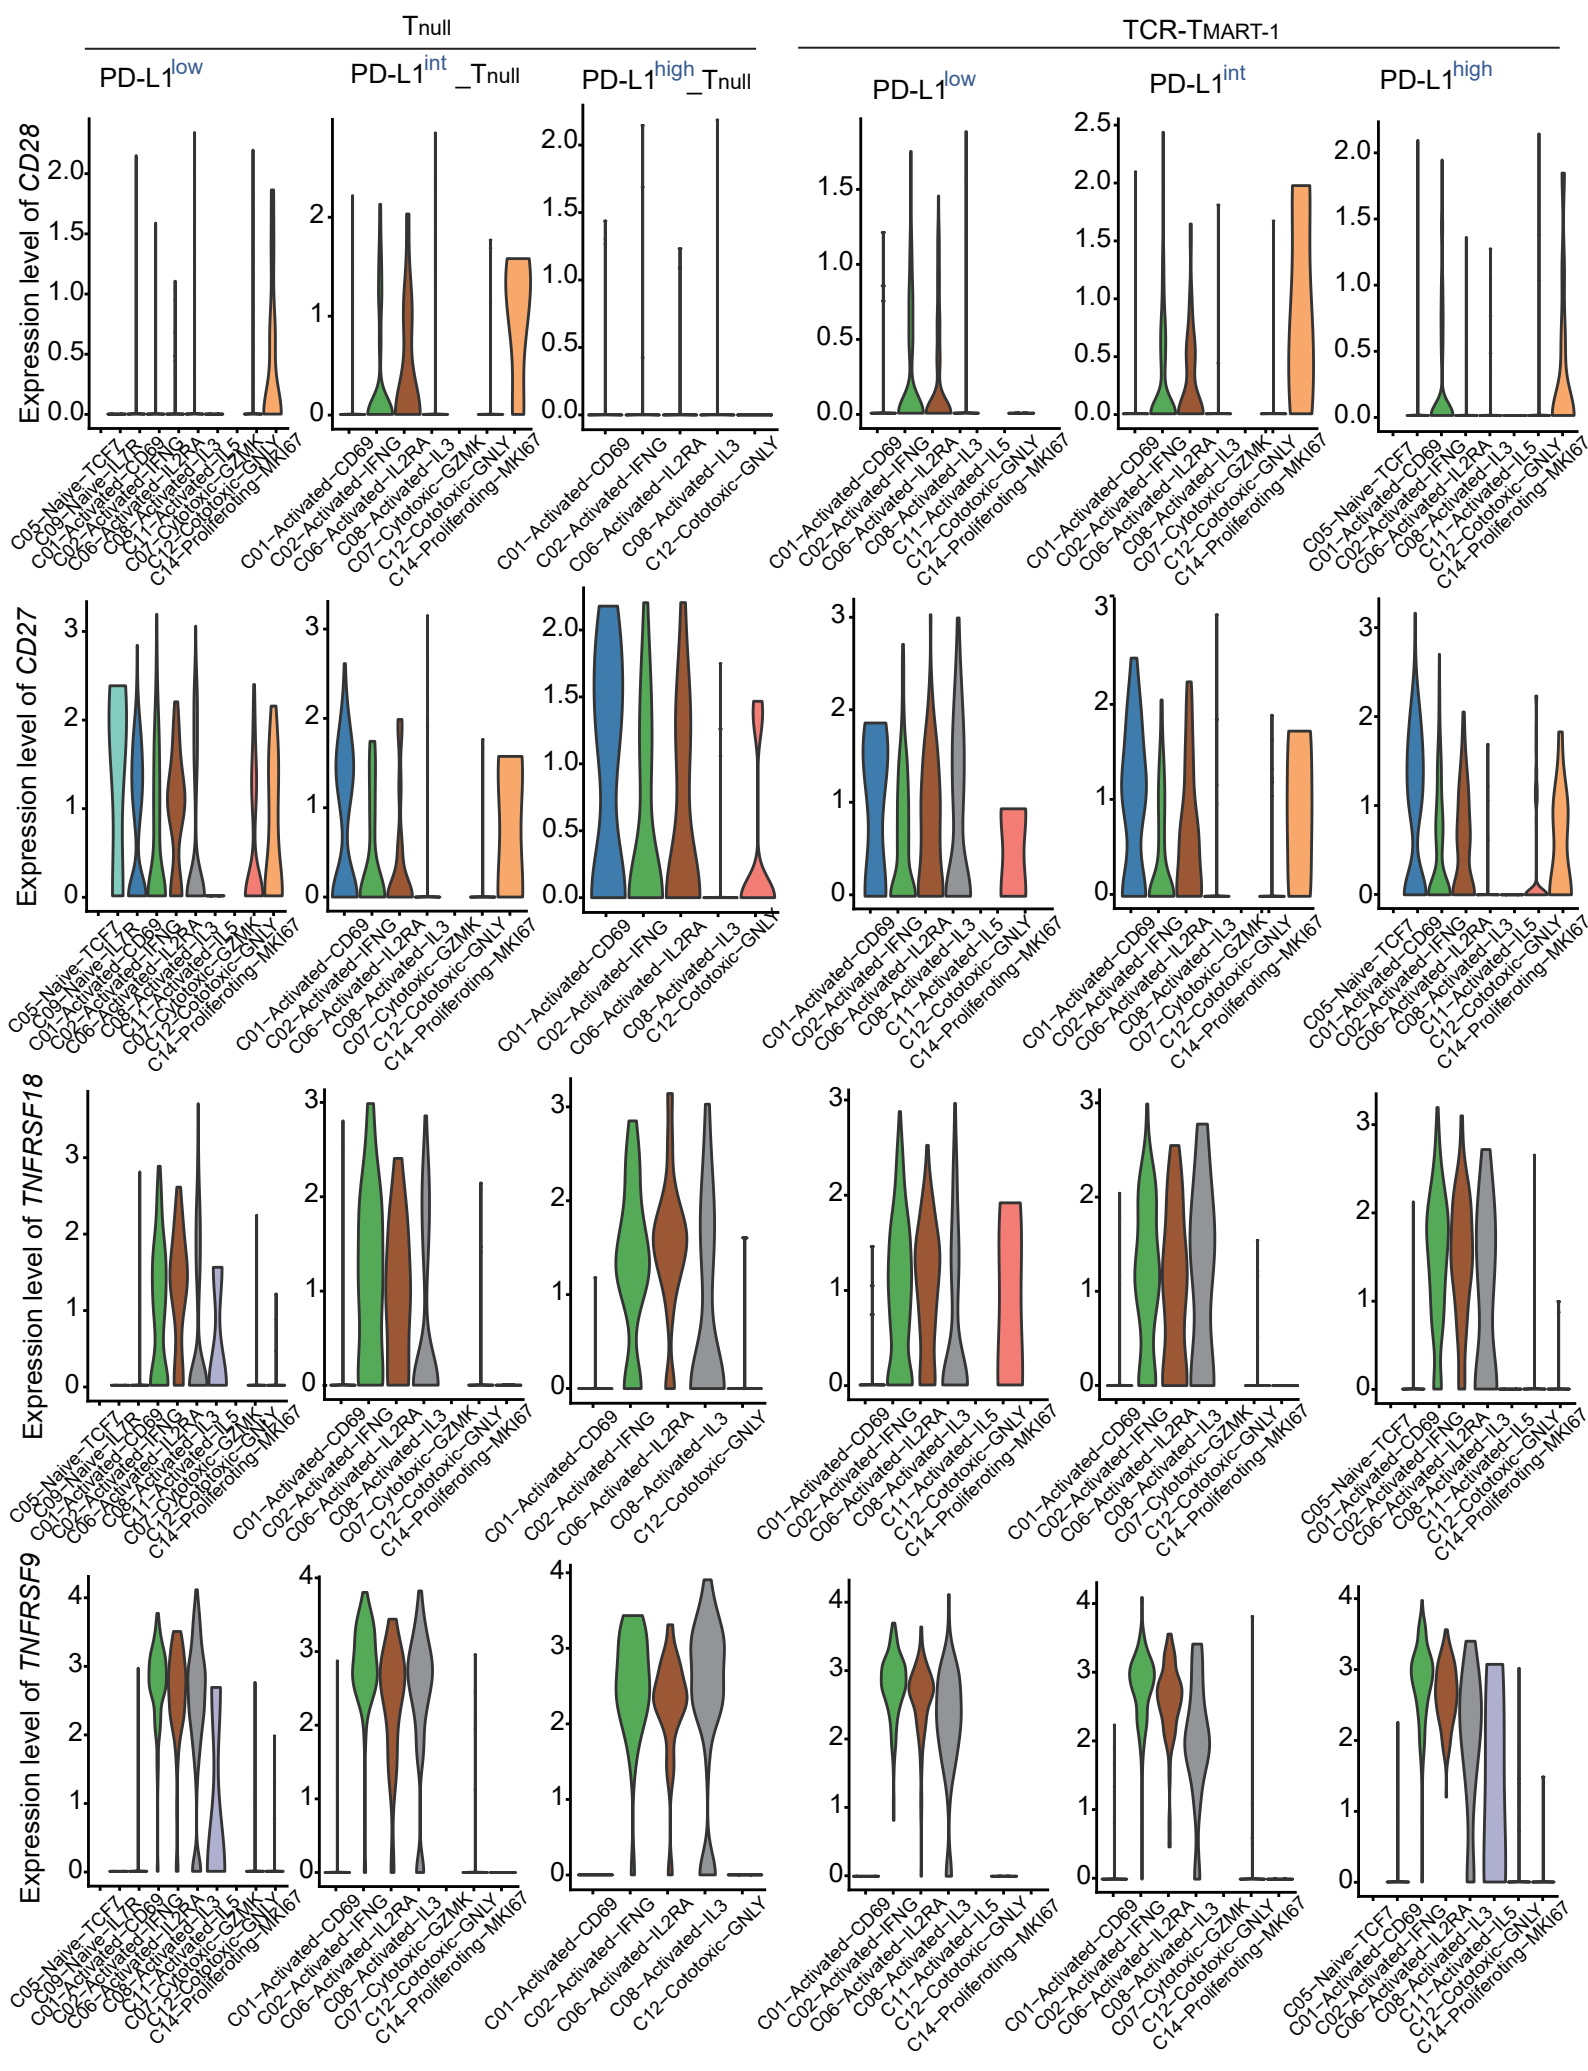

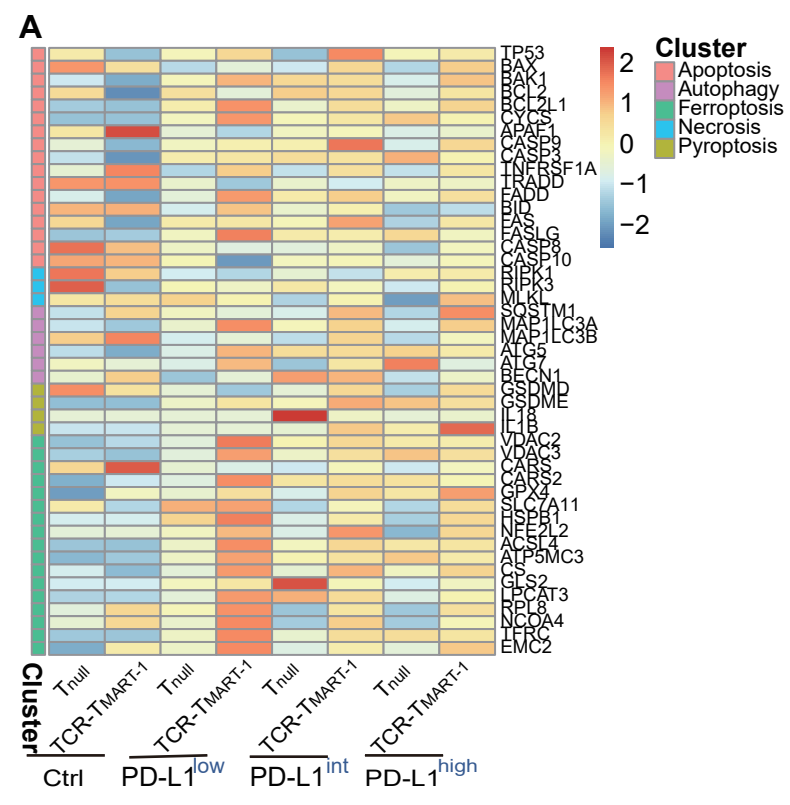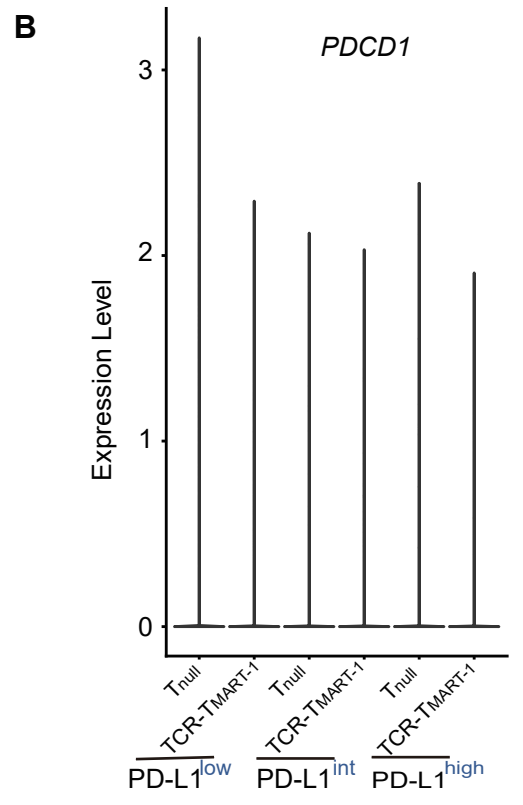

Supplement: thnov11p4957s1.pdf [file thnov11p4957s1.pdf]
